# Supplementary material for: Metal-dependent photochromic performance in two isostructural supramolecular chains
Source: Royal Society of Chemistry journal article supplement (doi:10.1039/d0dt03929b), 2020-12-11
Supplement: d0dt03929b1.pdf [file d0dt03929b1.pdf]

## Supporting Information

### **Metal-dependent photochromic performance in two isostructural supramolecular chains**

Song-De Han, Ai-Ju Liu, Fei Xu, Zhen-Zhen Xue\*, Jie Pan, Guo-Ming Wang

College of Chemistry and Chemical Engineering, Qingdao University, Shandong

266071, P. R. China.

## Instruments used in this work

Elemental analyses (EA) were characterised on a Perkin-Elmer 2400 elemental analyzer. Thermogravimetric analyses (TGA) were characterised on a Perkin-Elmer TGA-7 thermogravimetric analyzer. IR analyses were characterised on a Bruker VECTOR 22 spectrometer. The luminescent analyses were characterised on an F-4700 FL spectrophotometer. The UV-Vis analyses were characterised on a Varian Cary 500 UV-Vis spectrophotometer. Electron paramagnetic resonance (EPR) analyses were characterised on Bruker EMX spectrometer. The photoirradiation course was completed with a Perfect Light PLS-SXE 300 (300 W). The powder X-ray diffraction (PXRD) analyses were characterised on a Rigaku D/max-2550 diffractometer with Cu-K $\alpha$  radiation ( $\lambda = 1.5418 \text{ \AA}$ ). The data for fitting the PXRD curve were extracted from the single-crystal XRD (SCXRD) data via Mercury.

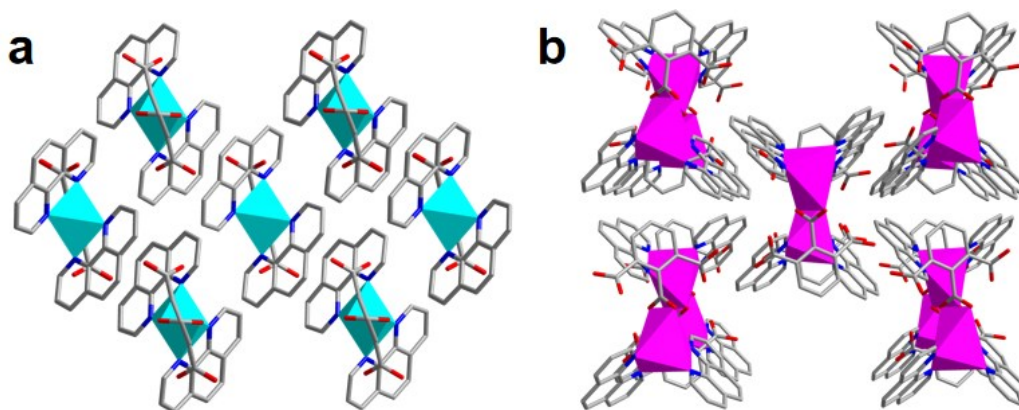

**Fig. S1** The packing structures of **1** (a) and **2** (b).

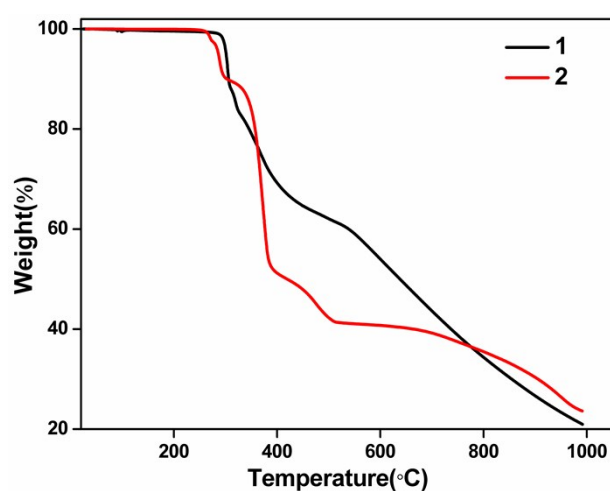

**Fig. S2** The TG plots of **1** and **2**.

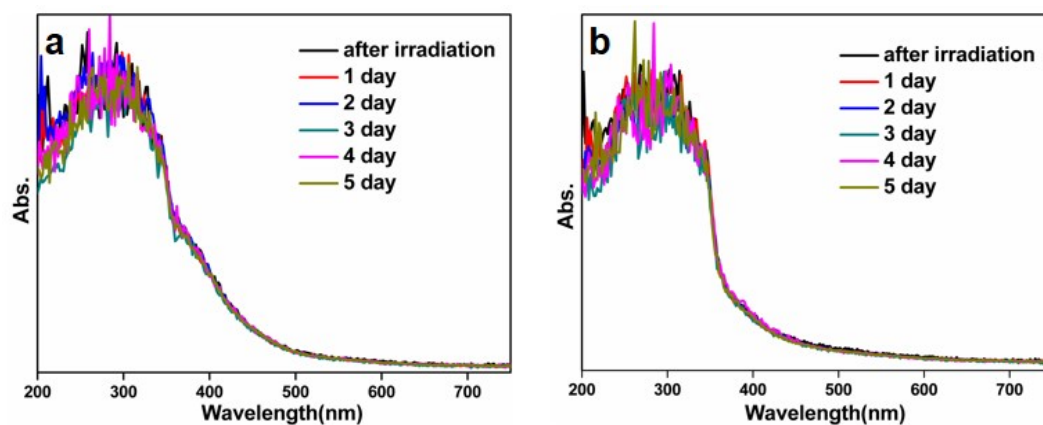

**Fig. S3** Time-dependent UV-Vis spectra of colored sample of **1** (a) and **2** (b) via putting the photoactivated samples in darkness.

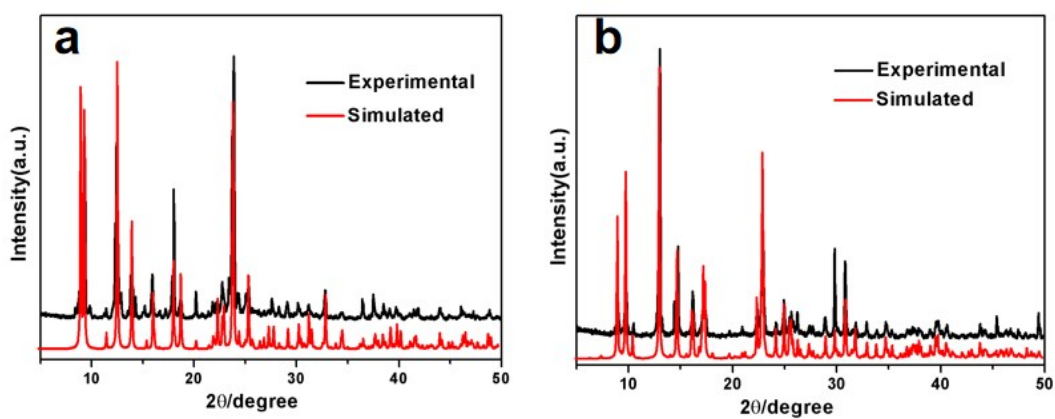

**Fig. S4** PXRD patterns of the photoactivated sample of **1** (a) and **2** (b).

**Table S1** Selected bond lengths (Å) and angles (°) for **1**

|                     |            |                     |            |
|---------------------|------------|---------------------|------------|
| Zn(1)-N(1)          | 2.0937(16) | Zn(1)-O(1)#1        | 2.1703(13) |
| Zn(1)-N(1)#1        | 2.0937(16) | Zn(1)-N(2)          | 2.1910(16) |
| Zn(1)-O(1)          | 2.1703(13) | Zn(1)-N(2)#1        | 2.1910(15) |
| N(1)-Zn(1)-N(1)#1   | 159.58(9)  | O(1)-Zn(1)-O(1)#1   | 60.35(7)   |
| N(1)-Zn(1)-O(1)     | 99.23(6)   | N(1)-Zn(1)-N(2)     | 77.65(6)   |
| N(1)#1-Zn(1)-O(1)   | 98.40(6)   | N(1)#1-Zn(1)-N(2)   | 87.96(6)   |
| N(1)-Zn(1)-O(1)#1   | 98.41(6)   | O(1)-Zn(1)-N(2)     | 164.41(5)  |
| N(1)#1-Zn(1)-O(1)#1 | 99.23(6)   | O(1)#1-Zn(1)-N(2)   | 104.69(5)  |
| N(1)-Zn(1)-N(2)#1   | 87.95(6)   | N(1)#1-Zn(1)-N(2)#1 | 77.65(6)   |
| O(1)-Zn(1)-N(2)#1   | 104.69(5)  | O(1)#1-Zn(1)-N(2)#1 | 164.41(5)  |
| N(2)-Zn(1)-N(2)#1   | 90.54(9)   |                     |            |

Symmetry codes:#1: -x+1, y, -z+1/2.

**Table S2** Selected bond lengths (Å) and angles (°) for **2**

|                 |            |                  |            |
|-----------------|------------|------------------|------------|
| Cd(1)-O(3)      | 2.318(3)   | Cd(2)-O(9)       | 2.373(3)   |
| Cd(1)-O(4)      | 2.335(3)   | Cd(2)-O(10)      | 2.276(3)   |
| Cd(1)-N(1)      | 2.290(4)   | Cd(2)-N(5)       | 2.293(4)   |
| Cd(1)-N(4)      | 2.294(4)   | Cd(2)-N(8)       | 2.301(4)   |
| Cd(1)-N(3)      | 2.293(4)   | Cd(2)-N(7)       | 2.343(4)   |
| Cd(1)-N(2)      | 2.301(4)   | Cd(2)-N(6)       | 2.374(4)   |
| N(1)-Cd(1)-N(4) | 156.03(16) | O(9)-Cd(2)-N(5)  | 101.05(14) |
| N(1)-Cd(1)-O(3) | 103.57(13) | O(9)-Cd(2)-N(8)  | 103.15(14) |
| N(4)-Cd(1)-O(3) | 95.62(13)  | N(5)-Cd(2)-N(8)  | 154.43(17) |
| N(1)-Cd(1)-O(4) | 102.76(13) | O(9)-Cd(2)-N(7)  | 154.79(13) |
| N(4)-Cd(1)-O(4) | 99.77(14)  | N(5)-Cd(2)-N(7)  | 89.43(15)  |
| O(3)-Cd(1)-O(4) | 56.40(12)  | N(8)-Cd(2)-N(7)  | 71.86(14)  |
| N(1)-Cd(1)-N(3) | 94.12(14)  | O(9)-Cd(2)-O(10) | 56.10(12)  |
| N(4)-Cd(1)-N(3) | 72.08(14)  | N(5)-Cd(2)-O(10) | 97.45(13)  |
| O(3)-Cd(1)-N(3) | 156.49(13) | N(8)-Cd(2)-O(10) | 102.79(14) |
| O(4)-Cd(1)-N(3) | 104.94(12) | N(7)-Cd(2)-O(10) | 100.12(13) |
| N(1)-Cd(1)-N(2) | 71.69(14)  | O(9)-Cd(2)-N(6)  | 109.18(13) |
| N(4)-Cd(1)-N(2) | 89.74(15)  | N(5)-Cd(2)-N(6)  | 71.71(14)  |
| O(3)-Cd(1)-N(2) | 104.86(12) | N(8)-Cd(2)-N(6)  | 92.50(15)  |
| O(4)-Cd(1)-N(2) | 159.47(13) | N(7)-Cd(2)-N(6)  | 95.84(17)  |
| N(3)-Cd(1)-N(2) | 95.26(14)  | O(10)-Cd(2)-N(6) | 160.65(14) |

**Table S3** SHAPE analysis of the metal ions in **1** and **2**

| Metal        | Label  | Shape                         | Symmetry | Distortion |
|--------------|--------|-------------------------------|----------|------------|
| <b>1-Zn1</b> | HP-6   | Hexagon                       | $D_{6h}$ | 25.431     |
| <b>1-Zn1</b> | PPY-6  | Pentagonal pyramid            | $C_{5v}$ | 22.623     |
| <b>1-Zn1</b> | OC-6   | Octahedron                    | $O_h$    | 7.880      |
| <b>1-Zn1</b> | TPR-6  | Trigonal prism                | $D_{3h}$ | 14.465     |
| <b>1-Zn1</b> | JPPY-6 | Johnson pentagonal pyramid J2 | $C_{5v}$ | 26.452     |
| <b>2-Cd1</b> | HP-6   | Hexagon                       | $D_{6h}$ | 27.344     |
| <b>2-Cd1</b> | PPY-6  | Pentagonal pyramid            | $C_{5v}$ | 21.004     |
| <b>2-Cd1</b> | OC-6   | Octahedron                    | $O_h$    | 5.122      |
| <b>2-Cd1</b> | TPR-6  | Trigonal prism                | $D_{3h}$ | 10.735     |
| <b>2-Cd1</b> | JPPY-6 | Johnson pentagonal pyramid J2 | $C_{5v}$ | 24.882     |
| <b>2-Cd2</b> | HP-6   | Hexagon                       | $D_{6h}$ | 27.554     |
| <b>2-Cd2</b> | PPY-6  | Pentagonal pyramid            | $C_{5v}$ | 21.114     |
| <b>2-Cd2</b> | OC-6   | Octahedron                    | $O_h$    | 5.306      |
| <b>2-Cd2</b> | TPR-6  | Trigonal prism                | $D_{3h}$ | 10.643     |
| <b>2-Cd2</b> | JPPY-6 | Johnson pentagonal pyramid J2 | $C_{5v}$ | 24.752     |

**Table S4** Details of selected hydrogen bond in **1**

| D–H...A    | $d(\text{D–H})$ (Å) | $d(\text{H...A})$ (Å) | $d(\text{D...A})$ (Å) | $\angle(\text{DHA})$ (deg) |
|------------|---------------------|-----------------------|-----------------------|----------------------------|
| O3–H3...O3 | 1.21                | 1.21                  | 2.424(3)              | 180                        |

**Table S5** Details of selected hydrogen bond in **2**

| D–H...A      | $d(\text{D–H})$ (Å) | $d(\text{H...A})$ (Å) | $d(\text{D...A})$ (Å) | $\angle(\text{DHA})$ (deg) |
|--------------|---------------------|-----------------------|-----------------------|----------------------------|
| O1–H1...O7   | 0.82                | 1.66                  | 2.418(5)              | 152                        |
| O12–H12...O6 | 0.82                | 1.62                  | 2.418(5)              | 164                        |
